# Supplementary material for: Bacterial exposure leads to variable mortality but not a measurable increase in surface antimicrobials across ant species
Source: PeerJ. 2020 Dec 3;8:e10412. doi: 10.7717/peerj.10412 (PMC7719289; doi:10.7717/peerj.10412)
Supplement: Supplemental Information 1 — Each experiment and data analyses are contained in a different tab, which is labeled further, therein. [file peerj-08-10412-s001.xlsx]

## Sheet: exposure raw
Ant Species	Colony	Time of Mortality count	Exposure treatment	Mortality (proportion total dead relative to start)		avg		24 hr control total avg			48 hr control total avg
B. chinensis	1	24h	S. epidermidis	0.12		0.036		0.0270833			0.064303
B. chinensis	2	24h	S. epidermidis	0
B. chinensis	3	24h	S. epidermidis	0.02
B. chinensis	4	24h	S. epidermidis	0
B. chinensis	5	24h	S. epidermidis	0.02
B. chinensis	6	24h	S. epidermidis	0.08
B. chinensis	7	24h	S. epidermidis	0
B. chinensis	8	24h	S. epidermidis	0
B. chinensis	9	24h	S. epidermidis	0.04
B. chinensis	10	24h	S. epidermidis	0.02
B. chinensis	11	24h	S. epidermidis	0.1
B. chinensis	12	24h	S. epidermidis	0
B. chinensis	13	24h	S. epidermidis	0.02
B. chinensis	14	24h	S. epidermidis	0.08
B. chinensis	15	24h	S. epidermidis	0.04
						avg
B. chinensis	1	24h	E. coli	0.12		0.0346667
B. chinensis	2	24h	E. coli	0
B. chinensis	3	24h	E. coli	0.02
B. chinensis	4	24h	E. coli	0
B. chinensis	5	24h	E. coli	0.02
B. chinensis	6	24h	E. coli	0.02
B. chinensis	7	24h	E. coli	0
B. chinensis	8	24h	E. coli	0
B. chinensis	9	24h	E. coli	0.08
B. chinensis	10	24h	E. coli	0.04
B. chinensis	11	24h	E. coli	0.04
B. chinensis	12	24h	E. coli	0
B. chinensis	13	24h	E. coli	0.12
B. chinensis	14	24h	E. coli	0.04
B. chinensis	15	24h	E. coli	0.02
						avg
B. chinensis	1	24h	Control	0.02		0.0106667
B. chinensis	2	24h	Control	0
B. chinensis	3	24h	Control	0.02
B. chinensis	4	24h	Control	0
B. chinensis	5	24h	Control	0
B. chinensis	6	24h	Control	0
B. chinensis	7	24h	Control	0
B. chinensis	8	24h	Control	0.02
B. chinensis	9	24h	Control	0.02
B. chinensis	10	24h	Control	0.02
B. chinensis	11	24h	Control	0
B. chinensis	12	24h	Control	0
B. chinensis	13	24h	Control	0.02
B. chinensis	14	24h	Control	0.02
B. chinensis	15	24h	Control	0.02
						avg
B. chinensis	1	48h	S. epidermidis	0.14		0.0706667
B. chinensis	2	48h	S. epidermidis	0.04
B. chinensis	3	48h	S. epidermidis	0.1
B. chinensis	4	48h	S. epidermidis	0.08
B. chinensis	5	48h	S. epidermidis	0.12
B. chinensis	6	48h	S. epidermidis	0.06
B. chinensis	7	48h	S. epidermidis	0.02
B. chinensis	8	48h	S. epidermidis	0.04
B. chinensis	9	48h	S. epidermidis	0.04
B. chinensis	10	48h	S. epidermidis	0.12
B. chinensis	11	48h	S. epidermidis	0.04
B. chinensis	12	48h	S. epidermidis	0.02
B. chinensis	13	48h	S. epidermidis	0.12
B. chinensis	14	48h	S. epidermidis	0.06
B. chinensis	15	48h	S. epidermidis	0.06
						avg
B. chinensis	1	48h	E. coli	0.14		0.076
B. chinensis	2	48h	E. coli	0.04
B. chinensis	3	48h	E. coli	0.1
B. chinensis	4	48h	E. coli	0.08
B. chinensis	5	48h	E. coli	0.06
B. chinensis	6	48h	E. coli	0.04
B. chinensis	7	48h	E. coli	0.02
B. chinensis	8	48h	E. coli	0.08
B. chinensis	9	48h	E. coli	0.06
B. chinensis	10	48h	E. coli	0.12
B. chinensis	11	48h	E. coli	0.02
B. chinensis	12	48h	E. coli	0.14
B. chinensis	13	48h	E. coli	0.08
B. chinensis	14	48h	E. coli	0.12
B. chinensis	15	48h	E. coli	0.04
						avg
B. chinensis	1	48h	Control	0.04		0.0732121
B. chinensis	2	48h	Control	0.0181818
B. chinensis	3	48h	Control	0.08
B. chinensis	4	48h	Control	0.06
B. chinensis	5	48h	Control	0.1
B. chinensis	6	48h	Control	0.1
B. chinensis	7	48h	Control	0.02
B. chinensis	8	48h	Control	0.02
B. chinensis	9	48h	Control	0.02
B. chinensis	10	48h	Control	0.04
B. chinensis	11	48h	Control	0.02
B. chinensis	12	48h	Control	0.2
B. chinensis	13	48h	Control	0.06
B. chinensis	14	48h	Control	0.22
B. chinensis	15	48h	Control	0.1
						avg
A. rudis	1	24h	S. epidermidis	0.02		0.0106667
A. rudis	2	24h	S. epidermidis	0.02
A. rudis	3	24h	S. epidermidis	0.04
A. rudis	4	24h	S. epidermidis	0
A. rudis	5	24h	S. epidermidis	0.02
A. rudis	6	24h	S. epidermidis	0
A. rudis	7	24h	S. epidermidis	0
A. rudis	8	24h	S. epidermidis	0.04
A. rudis	9	24h	S. epidermidis	0.02
A. rudis	10	24h	S. epidermidis	0
A. rudis	11	24h	S. epidermidis	0
A. rudis	12	24h	S. epidermidis	0
A. rudis	13	24h	S. epidermidis	0
A. rudis	14	24h	S. epidermidis	0
A. rudis	15	24h	S. epidermidis	0
						avg
A. rudis	1	24h	E. coli	0.02		0.036
A. rudis	2	24h	E. coli	0.04
A. rudis	3	24h	E. coli	0.14
A. rudis	4	24h	E. coli	0.02
A. rudis	5	24h	E. coli	0.04
A. rudis	6	24h	E. coli	0.02
A. rudis	7	24h	E. coli	0.08
A. rudis	8	24h	E. coli	0.02
A. rudis	9	24h	E. coli	0.02
A. rudis	10	24h	E. coli	0
A. rudis	11	24h	E. coli	0.02
A. rudis	12	24h	E. coli	0
A. rudis	13	24h	E. coli	0.04
A. rudis	14	24h	E. coli	0.06
A. rudis	15	24h	E. coli	0.02
						avg
A. rudis	1	24h	Control	0.02		0.02
A. rudis	2	24h	Control	0.02
A. rudis	3	24h	Control	0.04
A. rudis	4	24h	Control	0.04
A. rudis	5	24h	Control	0.02
A. rudis	6	24h	Control	0
A. rudis	7	24h	Control	0.04
A. rudis	8	24h	Control	0.02
A. rudis	9	24h	Control	0.06
A. rudis	10	24h	Control	0
A. rudis	11	24h	Control	0
A. rudis	12	24h	Control	0
A. rudis	13	24h	Control	0.02
A. rudis	14	24h	Control	0
A. rudis	15	24h	Control	0.02
						avg
A. rudis	1	48h	S. epidermidis	0.02		0.0213333
A. rudis	2	48h	S. epidermidis	0.02
A. rudis	3	48h	S. epidermidis	0.08
A. rudis	4	48h	S. epidermidis	0.02
A. rudis	5	48h	S. epidermidis	0.06
A. rudis	6	48h	S. epidermidis	0.02
A. rudis	7	48h	S. epidermidis	0.02
A. rudis	8	48h	S. epidermidis	0.04
A. rudis	9	48h	S. epidermidis	0.02
A. rudis	10	48h	S. epidermidis	0.02
A. rudis	11	48h	S. epidermidis	0
A. rudis	12	48h	S. epidermidis	0
A. rudis	13	48h	S. epidermidis	0
A. rudis	14	48h	S. epidermidis	0
A. rudis	15	48h	S. epidermidis	0
						avg
A. rudis	1	48h	E. coli	0.04		0.0546667
A. rudis	2	48h	E. coli	0.06
A. rudis	3	48h	E. coli	0.16
A. rudis	4	48h	E. coli	0.02
A. rudis	5	48h	E. coli	0.06
A. rudis	6	48h	E. coli	0.04
A. rudis	7	48h	E. coli	0.1
A. rudis	8	48h	E. coli	0.04
A. rudis	9	48h	E. coli	0.06
A. rudis	10	48h	E. coli	0.02
A. rudis	11	48h	E. coli	0.04
A. rudis	12	48h	E. coli	0.02
A. rudis	13	48h	E. coli	0.06
A. rudis	14	48h	E. coli	0.06
A. rudis	15	48h	E. coli	0.04
						avg
A. rudis	1	48h	Control	0.06		0.0306667
A. rudis	2	48h	Control	0.02
A. rudis	3	48h	Control	0.08
A. rudis	4	48h	Control	0.04
A. rudis	5	48h	Control	0.04
A. rudis	6	48h	Control	0
A. rudis	7	48h	Control	0.06
A. rudis	8	48h	Control	0.04
A. rudis	9	48h	Control	0.06
A. rudis	10	48h	Control	0.02
A. rudis	11	48h	Control	0
A. rudis	12	48h	Control	0
A. rudis	13	48h	Control	0.02
A. rudis	14	48h	Control	0
A. rudis	15	48h	Control	0.02
						avg
D. bureni	1	24h	S. epidermidis	0.1		0.0293333
D. bureni	2	24h	S. epidermidis	0
D. bureni	3	24h	S. epidermidis	0
D. bureni	4	24h	S. epidermidis	0
D. bureni	5	24h	S. epidermidis	0.06
D. bureni	6	24h	S. epidermidis	0.14
D. bureni	7	24h	S. epidermidis	0.04
D. bureni	8	24h	S. epidermidis	0
D. bureni	9	24h	S. epidermidis	0
D. bureni	10	24h	S. epidermidis	0.02
D. bureni	11	24h	S. epidermidis	0.02
D. bureni	12	24h	S. epidermidis	0.02
D. bureni	13	24h	S. epidermidis	0.02
D. bureni	14	24h	S. epidermidis	0
D. bureni	15	24h	S. epidermidis	0.02
						avg
D. bureni	1	24h	E. coli	0.8		0.236
D. bureni	2	24h	E. coli	0.48
D. bureni	3	24h	E. coli	0.16
D. bureni	4	24h	E. coli	0.22
D. bureni	5	24h	E. coli	0.1
D. bureni	6	24h	E. coli	0.4
D. bureni	7	24h	E. coli	0.5
D. bureni	8	24h	E. coli	0.02
D. bureni	9	24h	E. coli	0.14
D. bureni	10	24h	E. coli	0.08
D. bureni	11	24h	E. coli	0.06
D. bureni	12	24h	E. coli	0.12
D. bureni	13	24h	E. coli	0.04
D. bureni	14	24h	E. coli	0.18
D. bureni	15	24h	E. coli	0.24
						avg
D. bureni	1	24h	Control	0.16		0.036
D. bureni	2	24h	Control	0.1
D. bureni	3	24h	Control	0
D. bureni	4	24h	Control	0.02
D. bureni	5	24h	Control	0.06
D. bureni	6	24h	Control	0.06
D. bureni	7	24h	Control	0
D. bureni	8	24h	Control	0.04
D. bureni	9	24h	Control	0
D. bureni	10	24h	Control	0.02
D. bureni	11	24h	Control	0
D. bureni	12	24h	Control	0
D. bureni	13	24h	Control	0
D. bureni	14	24h	Control	0.04
D. bureni	15	24h	Control	0.04
						avg
D. bureni	1	48h	S. epidermidis	0.12		0.0426667
D. bureni	2	48h	S. epidermidis	0
D. bureni	3	48h	S. epidermidis	0
D. bureni	4	48h	S. epidermidis	0.02
D. bureni	5	48h	S. epidermidis	0.08
D. bureni	6	48h	S. epidermidis	0.2
D. bureni	7	48h	S. epidermidis	0.04
D. bureni	8	48h	S. epidermidis	0
D. bureni	9	48h	S. epidermidis	0
D. bureni	10	48h	S. epidermidis	0.02
D. bureni	11	48h	S. epidermidis	0.02
D. bureni	12	48h	S. epidermidis	0.06
D. bureni	13	48h	S. epidermidis	0.04
D. bureni	14	48h	S. epidermidis	0
D. bureni	15	48h	S. epidermidis	0.04
D. bureni	1	48h	E. coli	0.86
D. bureni	2	48h	E. coli	0.6
D. bureni	3	48h	E. coli	0.36
D. bureni	4	48h	E. coli	0.54
D. bureni	5	48h	E. coli	0.38
D. bureni	6	48h	E. coli	0.56
D. bureni	7	48h	E. coli	0.62
D. bureni	8	48h	E. coli	0.16
D. bureni	9	48h	E. coli	0.3
D. bureni	10	48h	E. coli	0.14
D. bureni	11	48h	E. coli	0.18
D. bureni	12	48h	E. coli	0.32
D. bureni	13	48h	E. coli	0.08
D. bureni	14	48h	E. coli	0.24
D. bureni	15	48h	E. coli	0.26
						avg
D. bureni	1	48h	Control	0.16		0.0613333
D. bureni	2	48h	Control	0.14
D. bureni	3	48h	Control	0
D. bureni	4	48h	Control	0.02
D. bureni	5	48h	Control	0.1
D. bureni	6	48h	Control	0.06
D. bureni	7	48h	Control	0
D. bureni	8	48h	Control	0.06
D. bureni	9	48h	Control	0
D. bureni	10	48h	Control	0.06
D. bureni	11	48h	Control	0.02
D. bureni	12	48h	Control	0.14
D. bureni	13	48h	Control	0.04
D. bureni	14	48h	Control	0.08
D. bureni	15	48h	Control	0.04
						avg
S. invicta	1	24h	S. epidermidis	0.245		0.144333
S. invicta	2	24h	S. epidermidis	0.015
S. invicta	3	24h	S. epidermidis	0.03
S. invicta	4	24h	S. epidermidis	0.305
S. invicta	5	24h	S. epidermidis	0.02
S. invicta	6	24h	S. epidermidis	0.025
S. invicta	7	24h	S. epidermidis	0.03
S. invicta	8	24h	S. epidermidis	0.04
S. invicta	9	24h	S. epidermidis	0.005
S. invicta	10	24h	S. epidermidis	0.015
S. invicta	11	24h	S. epidermidis	0
S. invicta	12	24h	S. epidermidis	0.07
S. invicta	13	24h	S. epidermidis	0.595
S. invicta	14	24h	S. epidermidis	0.475
S. invicta	15	24h	S. epidermidis	0.295
						avg
S. invicta	1	24h	E. coli	0.99		0.186
S. invicta	2	24h	E. coli	0.195
S. invicta	3	24h	E. coli	0.1
S. invicta	4	24h	E. coli	0.29
S. invicta	5	24h	E. coli	0.045
S. invicta	6	24h	E. coli	0.07
S. invicta	7	24h	E. coli	0.02
S. invicta	8	24h	E. coli	0.035
S. invicta	9	24h	E. coli	0.04
S. invicta	10	24h	E. coli	0.015
S. invicta	11	24h	E. coli	0.05
S. invicta	12	24h	E. coli	0.17
S. invicta	13	24h	E. coli	0.495
S. invicta	14	24h	E. coli	0.235
S. invicta	15	24h	E. coli	0.04
						avg
S. invicta	1	24h	Control	0.29		0.0416667
S. invicta	2	24h	Control	0.005
S. invicta	3	24h	Control	0.01
S. invicta	4	24h	Control	0.24
S. invicta	5	24h	Control	0.025
S. invicta	6	24h	Control	0
S. invicta	7	24h	Control	0.01
S. invicta	8	24h	Control	0.02
S. invicta	9	24h	Control	0
S. invicta	10	24h	Control	0.005
S. invicta	11	24h	Control	0
S. invicta	12	24h	Control	0.01
S. invicta	13	24h	Control	0
S. invicta	14	24h	Control	0.01
S. invicta	15	24h	Control	0
						avg
S. invicta	1	48h	S. epidermidis	0.825		0.277333
S. invicta	2	48h	S. epidermidis	0.025
S. invicta	3	48h	S. epidermidis	0.09
S. invicta	4	48h	S. epidermidis	0.78
S. invicta	5	48h	S. epidermidis	0.05
S. invicta	6	48h	S. epidermidis	0.03
S. invicta	7	48h	S. epidermidis	0.13
S. invicta	8	48h	S. epidermidis	0.135
S. invicta	9	48h	S. epidermidis	0.01
S. invicta	10	48h	S. epidermidis	0.02
S. invicta	11	48h	S. epidermidis	0
S. invicta	12	48h	S. epidermidis	0.1
S. invicta	13	48h	S. epidermidis	0.87
S. invicta	14	48h	S. epidermidis	0.59
S. invicta	15	48h	S. epidermidis	0.505
						avg
S. invicta	1	48h	E. coli	1		0.288
S. invicta	2	48h	E. coli	0.375
S. invicta	3	48h	E. coli	0.125
S. invicta	4	48h	E. coli	0.76
S. invicta	5	48h	E. coli	0.07
S. invicta	6	48h	E. coli	0.225
S. invicta	7	48h	E. coli	0.075
S. invicta	8	48h	E. coli	0.075
S. invicta	9	48h	E. coli	0.06
S. invicta	10	48h	E. coli	0.025
S. invicta	11	48h	E. coli	0.145
S. invicta	12	48h	E. coli	0.275
S. invicta	13	48h	E. coli	0.61
S. invicta	14	48h	E. coli	0.4
S. invicta	15	48h	E. coli	0.1
						avg
S. invicta	1	48h	Control	0.675		0.092
S. invicta	2	48h	Control	0.04
S. invicta	3	48h	Control	0.04
S. invicta	4	48h	Control	0.345
S. invicta	5	48h	Control	0.085
S. invicta	6	48h	Control	0.005
S. invicta	7	48h	Control	0.04
S. invicta	8	48h	Control	0.025
S. invicta	9	48h	Control	0.005
S. invicta	10	48h	Control	0.035
S. invicta	11	48h	Control	0.005
S. invicta	12	48h	Control	0.02
S. invicta	13	48h	Control	0.02
S. invicta	14	48h	Control	0.02
S. invicta	15	48h	Control	0.02

## Sheet: b. chinensis 24 h
> library(scmamp)
> geg <- read.csv (file="~/R/ANA.24.csv", head=T, sep=",")
> geg
S..epidermidis E..coli Control
1 0.12 0.12 0.02
2 0.00 0.00 0.00
3 0.02 0.02 0.02
4 0.00 0.00 0.00
5 0.02 0.02 0.00
6 0.08 0.02 0.00
7 0.00 0.00 0.00
8 0.00 0.00 0.02
9 0.04 0.08 0.02
10 0.02 0.04 0.02
11 0.10 0.04 0.00
12 0.00 0.00 0.00
13 0.02 0.12 0.02
14 0.08 0.04 0.02
15 0.04 0.02 0.02
16 0.00 0.04 0.05
> geg.matrix <- data.matrix(geg)
> geg.matrix
S..epidermidis E..coli Control
[1,] 0.12 0.12 0.02
[2,] 0.00 0.00 0.00
[3,] 0.02 0.02 0.02
[4,] 0.00 0.00 0.00
[5,] 0.02 0.02 0.00
[6,] 0.08 0.02 0.00
[7,] 0.00 0.00 0.00
[8,] 0.00 0.00 0.02
[9,] 0.04 0.08 0.02
[10,] 0.02 0.04 0.02
[11,] 0.10 0.04 0.00
[12,] 0.00 0.00 0.00
[13,] 0.02 0.12 0.02
[14,] 0.08 0.04 0.02
[15,] 0.04 0.02 0.02
[16,] 0.00 0.04 0.05
> postHocTest (data=geg.matrix, test="aligned ranks", correct="bergmann")
$summary
S..epidermidis E..coli Control
[1,] 0.03375 0.035 0.013125
$raw.pval
S..epidermidis E..coli Control
S..epidermidis NA 0.9446330 0.0328471
E..coli 0.9446330 NA 0.0275669
Control 0.0328471 0.0275669 NA
$corrected.pval
S..epidermidis E..coli Control
S..epidermidis NA 0.94463303 0.08270071
E..coli 0.94463303 NA 0.08270071
Control 0.08270071 0.08270071 NA
> contrastEstimationMatrix(geg.matrix)
S..epidermidis E..coli Control
S..epidermidis 0.000000000 -0.003333333 0.003333333
E..coli 0.003333333 0.000000000 0.006666667
Control -0.003333333 -0.006666667 0.000000000
> friedmanTest(geg.matrix)
Friedman's rank sum test
data: geg.matrix
Friedman's chi-squared = 2.8438, df = 2, p-value = 0.2413
> pvalues <- friedmanPost(geg.matrix)
> pvalues
S..epidermidis E..coli Control
S..epidermidis NA 0.9295680 0.1572992
E..coli 0.9295680 NA 0.1329417
Control 0.1572992 0.1329417 NA
> imanDavenportTest(geg.matrix)
Iman Davenport's correction of Friedman's rank sum test
data: geg.matrix
Corrected Friedman's chi-squared = 1.463, df1 = 2, df2 = 30, p-value =
0.2476
> anovaTest(geg.matrix) ## if assumptions are met ...
F-test for K population means (Analysis of Variance)
data: geg.matrix
F statistic = 2.1594, df1 = 2, df2 = 45, p-value = 0.1272
> rankMatrix(geg.matrix)
S..epidermidis E..coli Control
[1,] 1.5 1.5 3.0
[2,] 2.0 2.0 2.0
[3,] 2.0 2.0 2.0
[4,] 2.0 2.0 2.0
[5,] 1.5 1.5 3.0
[6,] 1.0 2.0 3.0
[7,] 2.0 2.0 2.0
[8,] 2.5 2.5 1.0
[9,] 2.0 1.0 3.0
[10,] 2.5 1.0 2.5
[11,] 1.0 2.0 3.0
[12,] 2.0 2.0 2.0
[13,] 2.5 1.0 2.5
[14,] 1.0 2.0 3.0
[15,] 1.0 2.5 2.5
[16,] 3.0 2.0 1.0
> quadeTest(geg.matrix)
Quade for Multiple Comparisons
data: geg.matrix
T = 2.839, df = 2, p-value = 0.07427
> multipleComparisonTest(data=geg.matrix, test="iman")
Iman Davenport's correction of Friedman's rank sum test
data: data.multipleComparisonTest
Corrected Friedman's chi-squared = 1.463, df1 = 2, df2 = 30, p-value =
0.2476
> test <- nemenyiTest (geg.matrix, alpha=0.05)
> test
Nemenyi test
data: geg.matrix
Critical difference = 0.85688, k = 3, df = 45
> test$diff.matrix
S..epidermidis E..coli Control
[1,] 0.00000 0.03125 -0.50000
[2,] 0.03125 0.00000 -0.53125
[3,] -0.50000 -0.53125 0.00000
> raw.pvalues <- friedmanPost(geg.matrix)
> raw.pvalues
S..epidermidis E..coli Control
S..epidermidis NA 0.9295680 0.1572992
E..coli 0.9295680 NA 0.1329417
Control 0.1572992 0.1329417 NA
> adjustFinner(raw.pvalues)
S..epidermidis E..coli Control
S..epidermidis NA 0.9585691 0.5750971
E..coli 0.9585691 NA 0.5750971
Control 0.5750971 0.5750971 NA
> post.results <- postHocTest(data=geg.matrix, test="aligned ranks", correct="bergmann",
+ use.rank = T)
> post.results
$summary
S..epidermidis E..coli Control
[1,] 1.84375 1.8125 2.34375
$raw.pval
S..epidermidis E..coli Control
S..epidermidis NA 0.9446330 0.0328471
E..coli 0.9446330 NA 0.0275669
Control 0.0328471 0.0275669 NA
$corrected.pval
S..epidermidis E..coli Control
S..epidermidis NA 0.94463303 0.08270071
E..coli 0.94463303 NA 0.08270071
Control 0.08270071 0.08270071 NA
> res <- tukeyTest(geg.matrix, alpha=0.1)
> res
Tukey test
data: geg.matrix
Critical difference = 0.0051754, K = 3, df2 = 45
> res$diff.matrix
[,1] [,2] [,3]
[1,] NA 0.001250 0.020625
[2,] 0.001250 NA 0.021875
[3,] 0.020625 0.021875 NA

## Sheet: b. chinensis 48 h
> library("scmamp")
> #### be sure to plave the csv file in the correct directory #############
> geg <- read.csv (file="~/R/ANA.csv", head=T, sep=",")
> geg
S..epidermidis E..coli Control
1 0.14 0.14 0.04000000
2 0.04 0.04 0.01818182
3 0.10 0.10 0.08000000
4 0.08 0.08 0.06000000
5 0.12 0.06 0.10000000
6 0.06 0.04 0.10000000
7 0.02 0.02 0.02000000
8 0.04 0.08 0.02000000
9 0.04 0.06 0.02000000
10 0.12 0.12 0.04000000
11 0.04 0.02 0.02000000
12 0.02 0.14 0.20000000
13 0.12 0.08 0.06000000
14 0.06 0.12 0.22000000
15 0.06 0.04 0.10000000
> ## convert to matrix
> geg.matrix <- data.matrix(geg)
> geg.matrix
S..epidermidis E..coli Control
[1,] 0.14 0.14 0.04000000
[2,] 0.04 0.04 0.01818182
[3,] 0.10 0.10 0.08000000
[4,] 0.08 0.08 0.06000000
[5,] 0.12 0.06 0.10000000
[6,] 0.06 0.04 0.10000000
[7,] 0.02 0.02 0.02000000
[8,] 0.04 0.08 0.02000000
[9,] 0.04 0.06 0.02000000
[10,] 0.12 0.12 0.04000000
[11,] 0.04 0.02 0.02000000
[12,] 0.02 0.14 0.20000000
[13,] 0.12 0.08 0.06000000
[14,] 0.06 0.12 0.22000000
[15,] 0.06 0.04 0.10000000
> postHocTest (data=geg.matrix, test="aligned ranks", correct="bergmann")
$summary
S..epidermidis E..coli Control
[1,] 0.07066667 0.076 0.07321212
$raw.pval
S..epidermidis E..coli Control
S..epidermidis NA 0.9224828 0.3887648
E..coli 0.9224828 NA 0.4445379
Control 0.3887648 0.4445379 NA
$corrected.pval
S..epidermidis E..coli Control
S..epidermidis NA 1 1
E..coli 1 NA 1
Control 1 1 NA
> contrastEstimationMatrix(geg.matrix)
S..epidermidis E..coli Control
S..epidermidis 0.000000e+00 -8.673617e-19 0.02
E..coli 8.673617e-19 0.000000e+00 0.02
Control -2.000000e-02 -2.000000e-02 0.00
> friedmanTest(geg.matrix)
Friedman's rank sum test
data: geg.matrix
Friedman's chi-squared = 2.2333, df = 2, p-value = 0.3274
> pvalues <- friedmanPost(geg.matrix)
> pvalues
S..epidermidis E..coli Control
S..epidermidis NA 0.6480769 0.1441270
E..coli 0.6480769 NA 0.3153025
Control 0.1441270 0.3153025 NA
> imanDavenportTest(geg.matrix)
Iman Davenport's correction of Friedman's rank sum test
data: geg.matrix
Corrected Friedman's chi-squared = 1.1261, df1 = 2, df2 = 28, p-value = 0.3386
> anovaTest(geg.matrix) ## if assumptions are met ...
F-test for K population means (Analysis of Variance)
data: geg.matrix
F statistic = 0.043787, df1 = 2, df2 = 42, p-value = 0.9572
> rankMatrix(geg.matrix)
S..epidermidis E..coli Control
[1,] 1.5 1.5 3.0
[2,] 1.5 1.5 3.0
[3,] 1.5 1.5 3.0
[4,] 1.5 1.5 3.0
[5,] 1.0 3.0 2.0
[6,] 2.0 3.0 1.0
[7,] 2.0 2.0 2.0
[8,] 2.0 1.0 3.0
[9,] 2.0 1.0 3.0
[10,] 1.5 1.5 3.0
[11,] 1.0 2.5 2.5
[12,] 3.0 2.0 1.0
[13,] 1.0 2.0 3.0
[14,] 3.0 2.0 1.0
[15,] 2.0 3.0 1.0
> quadeTest(geg.matrix)
Quade for Multiple Comparisons
data: geg.matrix
T = 0.061424, df = 2, p-value = 0.9406
> multipleComparisonTest(data=geg.matrix, test="iman")
Iman Davenport's correction of Friedman's rank sum test
data: data.multipleComparisonTest
Corrected Friedman's chi-squared = 1.1261, df1 = 2, df2 = 28, p-value = 0.3386
> test <- nemenyiTest (geg.matrix, alpha=0.05)
> test
Nemenyi test
data: geg.matrix
Critical difference = 0.88713, k = 3, df = 42
> test$diff.matrix
S..epidermidis E..coli Control
[1,] 0.0000000 -0.1666667 -0.5333333
[2,] -0.1666667 0.0000000 -0.3666667
[3,] -0.5333333 -0.3666667 0.0000000
> plotCD(test$diff.matrix, alpha = 0.05, cex = 0.75)
> raw.pvalues <- friedmanPost(geg.matrix)
> raw.pvalues
S..epidermidis E..coli Control
S..epidermidis NA 0.6480769 0.1441270
E..coli 0.6480769 NA 0.3153025
Control 0.1441270 0.3153025 NA
> abs(raw.pvalues) > test$statistic
S..epidermidis E..coli Control
S..epidermidis NA FALSE FALSE
E..coli FALSE NA FALSE
Control FALSE FALSE NA
> adjustFinner(raw.pvalues)
S..epidermidis E..coli Control
S..epidermidis NA 0.7144137 0.6069427
E..coli 0.7144137 NA 0.6069427
Control 0.6069427 0.6069427 NA
> post.results <- postHocTest(data=geg.matrix, test="aligned ranks", correct="bergmann",
+ use.rank=TRUE)
> post.results
$summary
S..epidermidis E..coli Control
[1,] 1.766667 1.933333 2.3
$raw.pval
S..epidermidis E..coli Control
S..epidermidis NA 0.9224828 0.3887648
E..coli 0.9224828 NA 0.4445379
Control 0.3887648 0.4445379 NA
$corrected.pval
S..epidermidis E..coli Control
S..epidermidis NA 1 1
E..coli 1 NA 1
Control 1 1 NA
> res <- tukeyTest(geg.matrix, alpha=0.1)
> res
Tukey test
data: geg.matrix
Critical difference = 0.0078928, K = 3, df2 = 42
> res$diff.matrix
[,1] [,2] [,3]
[1,] NA 0.005333333 0.002545455
[2,] 0.005333333 NA 0.002787879
[3,] 0.002545455 0.002787879 NA

## Sheet: a. rudis 24 h
> geg <- read.csv (file="~/R/AR.24.csv", head=T, sep=",")
> geg
	S..epidermidis	E..coli	Control
1	0.02	0.02	0.02		S..epidermidis	E..coli	Control
2	0.02	0.04	0.02	mean	0.0106667	0.036	0.02
3	0.04	0.14	0.04	SD	0.0148645	0.035617	0.0185164
4	0	0.02	0.04			cohen's d	glasses delta	hedges' g
5	0.02	0.04	0.02		E coli v control	0.564	0.449	0.564
6	0	0.02	0		s v control	0.534	0.6	0.534
7	0	0.08	0.04		s vs e	0.915	1.667	0.915
8	0.04	0.02	0.02
9	0.02	0.02	0.06
10	0	0	0
11	0	0.02	0
12	0	0	0
13	0	0.04	0.02
14	0	0.06	0
15	0	0.02	0.02
> geg.matrix <- data.matrix(geg)
> geg.matrix
S..epidermidis E..coli Control
[1,] 0.02 0.02 0.02
[2,] 0.02 0.04 0.02
[3,] 0.04 0.14 0.04
[4,] 0.00 0.02 0.04
[5,] 0.02 0.04 0.02
[6,] 0.00 0.02 0.00
[7,] 0.00 0.08 0.04
[8,] 0.04 0.02 0.02
[9,] 0.02 0.02 0.06
[10,] 0.00 0.00 0.00
[11,] 0.00 0.02 0.00
[12,] 0.00 0.00 0.00
[13,] 0.00 0.04 0.02
[14,] 0.00 0.06 0.00
[15,] 0.00 0.02 0.02
> postHocTest (data=geg.matrix, test="aligned ranks", correct="bergmann")
$summary
S..epidermidis E..coli Control
[1,] 0.01066667 0.036 0.02
$raw.pval
S..epidermidis E..coli Control
S..epidermidis NA 0.0002298235 0.10685069
E..coli 0.0002298235 NA 0.03833608
Control 0.1068506863 0.0383360763 NA
$corrected.pval
S..epidermidis E..coli Control
S..epidermidis NA 0.0006894704 0.10685069
E..coli 0.0006894704 NA 0.03833608
Control 0.1068506863 0.0383360763 NA
> contrastEstimationMatrix(geg.matrix)
S..epidermidis E..coli Control
S..epidermidis 0.00 -0.02 0.00
E..coli 0.02 0.00 0.02
Control 0.00 -0.02 0.00
> friedmanTest(geg.matrix)
Friedman's rank sum test
data: geg.matrix
Friedman's chi-squared = 6.6333, df = 2, p-value = 0.03627
> pvalues <- friedmanPost(geg.matrix)
> pvalues
S..epidermidis E..coli Control
S..epidermidis NA 0.01058714 0.3153025
E..coli 0.01058714 NA 0.1206908
Control 0.31530245 0.12069080 NA
> imanDavenportTest(geg.matrix)
Iman Davenport's correction of Friedman's rank sum test
data: geg.matrix
Corrected Friedman's chi-squared = 3.9743, df1 = 2, df2 = 28, p-value =
0.03025
> anovaTest(geg.matrix) ## if assumptions are met ...
F-test for K population means (Analysis of Variance)
data: geg.matrix
F statistic = 4.0312, df1 = 2, df2 = 42, p-value = 0.02503
> rankMatrix(geg.matrix)
S..epidermidis E..coli Control
[1,] 2.0 2.0 2.0
[2,] 2.5 1.0 2.5
[3,] 2.5 1.0 2.5
[4,] 3.0 2.0 1.0
[5,] 2.5 1.0 2.5
[6,] 2.5 1.0 2.5
[7,] 3.0 1.0 2.0
[8,] 1.0 2.5 2.5
[9,] 2.5 2.5 1.0
[10,] 2.0 2.0 2.0
[11,] 2.5 1.0 2.5
[12,] 2.0 2.0 2.0
[13,] 3.0 1.0 2.0
[14,] 2.5 1.0 2.5
[15,] 3.0 1.5 1.5
> quadeTest(geg.matrix)
Quade for Multiple Comparisons
data: geg.matrix
T = 5.3905, df = 2, p-value = 0.01046
> multipleComparisonTest(data=geg.matrix, test="iman")
Iman Davenport's correction of Friedman's rank sum test
data: data.multipleComparisonTest
Corrected Friedman's chi-squared = 3.9743, df1 = 2, df2 = 28, p-value =
0.03025
> test <- nemenyiTest (geg.matrix, alpha=0.05)
> test
Nemenyi test
data: geg.matrix
Critical difference = 0.88713, k = 3, df = 42
> test$diff.matrix
S..epidermidis E..coli Control
[1,] 0.0000000 0.9333333 0.3666667
[2,] 0.9333333 0.0000000 -0.5666667
[3,] 0.3666667 -0.5666667 0.0000000
> raw.pvalues <- friedmanPost(geg.matrix)
> raw.pvalues
S..epidermidis E..coli Control
S..epidermidis NA 0.01058714 0.3153025
E..coli 0.01058714 NA 0.1206908
Control 0.31530245 0.12069080 NA
> adjustFinner(raw.pvalues)
S..epidermidis E..coli Control
S..epidermidis	NA	0.0618651	0.365256
E..coli	0.0618651	NA	0.226815
Control	0.365256	0.226815	NA
> post.results <- postHocTest(data=geg.matrix, test="aligned ranks", correct="bergmann",
+ use.rank = T)
> post.results
$summary
S..epidermidis E..coli Control
[1,] 2.433333 1.5 2.066667
$raw.pval
S..epidermidis E..coli Control
S..epidermidis NA 0.0002298235 0.10685069
E..coli 0.0002298235 NA 0.03833608
Control 0.1068506863 0.0383360763 NA
$corrected.pval
S..epidermidis E..coli Control
S..epidermidis NA 0.0006894704 0.10685069
E..coli 0.0006894704 NA 0.03833608
Control 0.1068506863 0.0383360763 NA
> res <- tukeyTest(geg.matrix, alpha=0.1)
> res
Tukey test
data: geg.matrix
Critical difference = 0.0039508, K = 3, df2 = 42
> res$diff.matrix
[,1] [,2] [,3]
[1,] NA 0.02533333 0.009333333
[2,] 0.025333333 NA 0.016000000
[3,] 0.009333333 0.01600000 NA
>

## Sheet: a. rudis 48 h
library("scmamp")
> #### be sure to plave the csv file in the correct directory #############
> geg <- read.csv (file="~/R/AR.csv", head=T, sep=",")
> geg					S..epidermidis	E..coli	Control
	S..epidermidis	E..coli	Control	mean	0.0213333	0.0546667	0.0306667
1	0.02	0.04	0.06	SD	0.0232584	0.0358303	0.0260403
2	0.02	0.06	0.02			cohen's d	glasses delta	hedges' g
3	0.08	0.16	0.08		E coli v control	0.767	0.67	0.767
4	0.02	0.02	0.04		s v control	0.381	0.403	0.381
5	0.06	0.06	0.04		s vs e	1.106	1.433	1.106
6	0.02	0.04	0
7	0.02	0.1	0.06
8	0.04	0.04	0.04
9	0.02	0.06	0.06
10	0.02	0.02	0.02
11	0	0.04	0
12	0	0.02	0
13	0	0.06	0.02
14	0	0.06	0
15	0	0.04	0.02
> ## convert to matrix
> geg.matrix <- data.matrix(geg)
> geg.matrix
S..epidermidis E..coli Control
[1,] 0.02 0.04 0.06
[2,] 0.02 0.06 0.02
[3,] 0.08 0.16 0.08
[4,] 0.02 0.02 0.04
[5,] 0.06 0.06 0.04
[6,] 0.02 0.04 0.00
[7,] 0.02 0.10 0.06
[8,] 0.04 0.04 0.04
[9,] 0.02 0.06 0.06
[10,] 0.02 0.02 0.02
[11,] 0.00 0.04 0.00
[12,] 0.00 0.02 0.00
[13,] 0.00 0.06 0.02
[14,] 0.00 0.06 0.00
[15,] 0.00 0.04 0.02
> postHocTest (data=geg.matrix, test="aligned ranks", correct="bergmann")
$summary
S..epidermidis E..coli Control
[1,] 0.02133333 0.05466667 0.03066667
$raw.pval
S..epidermidis E..coli Control
S..epidermidis	NA	8.11192e-06	0.1624
E..coli	8.11192e-06	NA	0.00217552
Control	0.1624	0.00217552	NA
$corrected.pval
S..epidermidis E..coli Control
S..epidermidis	NA	2.43358e-05	0.1624
E..coli	2.43358e-05	NA	0.00217552
Control	0.1624	0.00217552	NA
> contrastEstimationMatrix(geg.matrix)
S..epidermidis E..coli Control
S..epidermidis 0.000000000 -0.03333333 -0.006666667
E..coli 0.033333333 0.00000000 0.026666667
Control 0.006666667 -0.02666667 0.000000000
> friedmanTest(geg.matrix)
Friedman's rank sum test
data: geg.matrix
Friedman's chi-squared = 10.033, df = 2, p-value = 0.006627
> pvalues <- friedmanPost(geg.matrix)
> pvalues
S..epidermidis E..coli Control
S..epidermidis NA 0.001910775 0.31530245
E..coli 0.001910775 NA 0.03576377
Control 0.315302452 0.035763767 NA
> friedmanAlignedRanksTest(geg.matrix) ## same ast Categoriacal Data ... p. 153
Friedman's Aligned Rank Test for Multiple Comparisons
data: geg.matrix
T = 14.71, df = 2, p-value = 0.0006395
> friedmanAlignedRanksPost(geg.matrix)
S..epidermidis E..coli Control
S..epidermidis NA 8.111925e-06 0.162399566
E..coli 8.111925e-06 NA 0.002175522
Control 1.623996e-01 2.175522e-03 NA
> imanDavenportTest(geg.matrix)
Iman Davenport's correction of Friedman's rank sum test
data: geg.matrix
Corrected Friedman's chi-squared = 7.0351, df1 = 2, df2 = 28, p-value = 0.003346
> anovaTest(geg.matrix) ## if assumptions are met ...
F-test for K population means (Analysis of Variance)
data: geg.matrix
F statistic = 5.3166, df1 = 2, df2 = 42, p-value = 0.008745
> rankMatrix(geg.matrix)
S..epidermidis E..coli Control
[1,] 3.0 2.0 1.0
[2,] 2.5 1.0 2.5
[3,] 2.5 1.0 2.5
[4,] 2.5 2.5 1.0
[5,] 1.5 1.5 3.0
[6,] 2.0 1.0 3.0
[7,] 3.0 1.0 2.0
[8,] 2.0 2.0 2.0
[9,] 3.0 1.5 1.5
[10,] 2.0 2.0 2.0
[11,] 2.5 1.0 2.5
[12,] 2.5 1.0 2.5
[13,] 3.0 1.0 2.0
[14,] 2.5 1.0 2.5
[15,] 3.0 1.0 2.0
> quadeTest(geg.matrix)
Quade for Multiple Comparisons
data: geg.matrix
T = 10.478, df = 2, p-value = 0.0004007
> multipleComparisonTest(data=geg.matrix, test="iman")
Iman Davenport's correction of Friedman's rank sum test
data: data.multipleComparisonTest
Corrected Friedman's chi-squared = 7.0351, df1 = 2, df2 = 28, p-value = 0.003346
> test <- nemenyiTest (geg.matrix, alpha=0.05)
> test
Nemenyi test
data: geg.matrix
Critical difference = 0.88713, k = 3, df = 42
> test$diff.matrix
S..epidermidis E..coli Control
[1,] 0.0000000 1.1333333 0.3666667
[2,] 1.1333333 0.0000000 -0.7666667
[3,] 0.3666667 -0.7666667 0.0000000
> plotCD(test$diff.matrix, alpha = 0.05, cex = 0.75)
> raw.pvalues <- friedmanPost(geg.matrix)
> raw.pvalues
S..epidermidis E..coli Control
S..epidermidis	NA	0.00191077	0.315302
E..coli	0.00191077	NA	0.0357638
Control	0.315302	0.0357638	NA
> abs(raw.pvalues) > test$statistic
S..epidermidis E..coli Control
S..epidermidis NA FALSE FALSE
E..coli FALSE NA FALSE
Control FALSE FALSE NA
> adjustFinner(raw.pvalues)
S..epidermidis E..coli Control
S..epidermidis	NA	0.01141	0.365256
E..coli	0.01141	NA	0.0702485
Control	0.365256	0.0702485	NA
> post.results <- postHocTest(data=geg.matrix, test="aligned ranks", correct="bergmann",
+ use.rank=TRUE)
> post.results
$summary
S..epidermidis E..coli Control
[1,] 2.5 1.366667 2.133333
$raw.pval
S..epidermidis E..coli Control
S..epidermidis NA 8.111925e-06 0.162399566
E..coli 8.111925e-06 NA 0.002175522
Control 1.623996e-01 2.175522e-03 NA
$corrected.pval
S..epidermidis E..coli Control
S..epidermidis NA 2.433578e-05 0.162399566
E..coli 2.433578e-05 NA 0.002175522
Control 1.623996e-01 2.175522e-03 NA
> res <- tukeyTest(geg.matrix, alpha=0.1)
> res
Tukey test
data: geg.matrix
Critical difference = 0.0046174, K = 3, df2 = 42
> res$diff.matrix
[,1] [,2] [,3]
[1,] NA 0.03333333 0.009333333
[2,] 0.033333333 NA 0.024000000
[3,] 0.009333333 0.02400000 NA

## Sheet: d. bureni 24 h
> library(scmamp)
> geg <- read.csv (file="~/R/DB.24.csv", head=T, sep=",")
> geg
	S..epidermidis	E..coli	Control		S..epidermidis	E..coli	Control
1	0.1	0.8	0.16	mean	0.0293333	0.236	0.036
2	0	0.48	0.1	SD	0.0413118	0.217938	0.0454816
3	0	0.16	0			cohen's d	glasses delta	hedges' g
4	0	0.22	0.02		E coli v control	1.27	0.917	1.27
5	0.06	0.1	0.06		s v control	0.161	0.171	0.161
6	0.14	0.4	0.06		s vs e	1.32	5.049	1.32
7	0.04	0.5	0
8	0	0.02	0.04
9	0	0.14	0
10	0.02	0.08	0.02
11	0.02	0.06	0
12	0.02	0.12	0
13	0.02	0.04	0
14	0	0.18	0.04
15	0.02	0.24	0.04
> geg.matrix <- data.matrix(geg)
> geg.matrix
S..epidermidis E..coli Control
[1,] 0.10 0.80 0.16
[2,] 0.00 0.48 0.10
[3,] 0.00 0.16 0.00
[4,] 0.00 0.22 0.02
[5,] 0.06 0.10 0.06
[6,] 0.14 0.40 0.06
[7,] 0.04 0.50 0.00
[8,] 0.00 0.02 0.04
[9,] 0.00 0.14 0.00
[10,] 0.02 0.08 0.02
[11,] 0.02 0.06 0.00
[12,] 0.02 0.12 0.00
[13,] 0.02 0.04 0.00
[14,] 0.00 0.18 0.04
[15,] 0.02 0.24 0.04
> postHocTest (data=geg.matrix, test="aligned ranks", correct="bergmann")
$summary
S..epidermidis E..coli Control
[1,] 0.02933333 0.236 0.036
$raw.pval
	S..epidermidis	E..coli	Control
S..epidermidis	NA	2.80475e-06	0.944588
E..coli	2.80475e-06	NA	3.9287e-06
Control	0.944588	3.9287e-06	NA
$corrected.pval
S..epidermidis E..coli Control
S..epidermidis NA 8.414237e-06 9.445878e-01
E..coli 8.414237e-06 NA 8.414237e-06
Control 9.445878e-01 8.414237e-06 NA
> contrastEstimationMatrix(geg.matrix)
S..epidermidis E..coli Control
S..epidermidis 0.000000000 -0.1533333 -0.006666667
E..coli 0.153333333 0.0000000 0.146666667
Control 0.006666667 -0.1466667 0.000000000
> friedmanTest(geg.matrix)
Friedman's rank sum test
data: geg.matrix
Friedman's chi-squared = 19.733, df = 2, p-value = 5.188e-05
> pvalues <- friedmanPost(geg.matrix)
> pvalues
S..epidermidis E..coli Control
S..epidermidis NA 5.903578e-05 0.7150006547
E..coli 5.903578e-05 NA 0.0002607296
Control 7.150007e-01 2.607296e-04 NA
> imanDavenportTest(geg.matrix)
Iman Davenport's correction of Friedman's rank sum test
data: geg.matrix
Corrected Friedman's chi-squared = 26.909, df1 = 2, df2 = 28, p-value =
3.022e-07
> anovaTest(geg.matrix) ## if assumptions are met ...
F-test for K population means (Analysis of Variance)
data: geg.matrix
F statistic = 12.105, df1 = 2, df2 = 42, p-value = 7.059e-05
> rankMatrix(geg.matrix)
S..epidermidis E..coli Control
[1,] 3.0 1 2.0
[2,] 3.0 1 2.0
[3,] 2.5 1 2.5
[4,] 3.0 1 2.0
[5,] 2.5 1 2.5
[6,] 2.0 1 3.0
[7,] 2.0 1 3.0
[8,] 3.0 2 1.0
[9,] 2.5 1 2.5
[10,] 2.5 1 2.5
[11,] 2.0 1 3.0
[12,] 2.0 1 3.0
[13,] 2.0 1 3.0
[14,] 3.0 1 2.0
[15,] 3.0 1 2.0
> quadeTest(geg.matrix)
Quade for Multiple Comparisons
data: geg.matrix
T = 18.812, df = 2, p-value = 6.627e-06
> multipleComparisonTest(data=geg.matrix, test="iman")
Iman Davenport's correction of Friedman's rank sum test
data: data.multipleComparisonTest
Corrected Friedman's chi-squared = 26.909, df1 = 2, df2 = 28, p-value =
3.022e-07
> test <- nemenyiTest (geg.matrix, alpha=0.05)
> test
Nemenyi test
data: geg.matrix
Critical difference = 0.88713, k = 3, df = 42
> test$diff.matrix
S..epidermidis E..coli Control
[1,] 0.0000000 1.466667 0.1333333
[2,] 1.4666667 0.000000 -1.3333333
[3,] 0.1333333 -1.333333 0.0000000
> raw.pvalues <- friedmanPost(geg.matrix)
> raw.pvalues
	S..epidermidis	E..coli	Control
S..epidermidis	NA	5.90358e-05	0.715001
E..coli	5.90358e-05	NA	0.00026073
Control	0.715001	0.00026073	NA
> adjustFinner(raw.pvalues)
	S..epidermidis	E..coli	Control
S..epidermidis	NA	0.000354162	0.778276
E..coli	0.000354162	NA	0.000521391
Control	0.778276	0.000521391	NA
> post.results <- postHocTest(data=geg.matrix, test="aligned ranks", correct="bergmann",
+ use.rank = T)
> post.results
$summary
S..epidermidis E..coli Control
[1,] 2.533333 1.066667 2.4
$raw.pval
S..epidermidis E..coli Control
S..epidermidis NA 2.804746e-06 9.445878e-01
E..coli 2.804746e-06 NA 3.928701e-06
Control 9.445878e-01 3.928701e-06 NA
$corrected.pval
S..epidermidis E..coli Control
S..epidermidis NA 8.414237e-06 9.445878e-01
E..coli 8.414237e-06 NA 8.414237e-06
Control 9.445878e-01 8.414237e-06 NA
> res <- tukeyTest(geg.matrix, alpha=0.1)
> res
Tukey test
data: geg.matrix
Critical difference = 0.020899, K = 3, df2 = 42
> res$diff.matrix
[,1] [,2] [,3]
[1,] NA 0.2066667 0.006666667
[2,] 0.206666667 NA 0.200000000
[3,] 0.006666667 0.2000000 NA

## Sheet: d. bureni 48 h
library("scmamp")
> #### be sure to plave the csv file in the correct directory #############
> geg <- read.csv (file="~/R/DB.csv", head=T, sep=",")
> geg					S..epidermidis	E..coli	Control
	Control	S..epidermidis	E..coli	mean	0.0426667	0.373333	0.0613333
1	0.16	0.12	0.86	SD	0.0554806	0.0554806	0.0531664
2	0.14	0	0.6			cohen's d	glasses delta	hedges' g
3	0	0	0.36		E coli v control	5.739	5.87	5.739
4	0.02	0.02	0.54		s v control	0.342	0.35	0.342
5	0.1	0.08	0.38		s vs e	5.951	5.951	5.951
6	0.06	0.2	0.56
7	0	0.04	0.62
8	0.06	0	0.16
9	0	0	0.3
10	0.06	0.02	0.14
11	0.02	0.02	0.18
12	0.14	0.06	0.32
13	0.04	0.04	0.08
14	0.08	0	0.24
15	0.04	0.04	0.26
> ## convert to matrix
> geg.matrix <- data.matrix(geg)
> geg.matrix
Control S..epidermidis E..coli
[1,] 0.16 0.12 0.86
[2,] 0.14 0.00 0.60
[3,] 0.00 0.00 0.36
[4,] 0.02 0.02 0.54
[5,] 0.10 0.08 0.38
[6,] 0.06 0.20 0.56
[7,] 0.00 0.04 0.62
[8,] 0.06 0.00 0.16
[9,] 0.00 0.00 0.30
[10,] 0.06 0.02 0.14
[11,] 0.02 0.02 0.18
[12,] 0.14 0.06 0.32
[13,] 0.04 0.04 0.08
[14,] 0.08 0.00 0.24
[15,] 0.04 0.04 0.26
> postHocTest (data=geg.matrix, test="aligned ranks", correct="bergmann")
$summary
Control S..epidermidis E..coli
[1,] 0.06133333 0.04266667 0.3733333
$raw.pval
Control S..epidermidis E..coli
Control NA 5.407745e-01 1.155851e-05
S..epidermidis 5.407745e-01 NA 5.810982e-07
E..coli 1.155851e-05 5.810982e-07 NA
$corrected.pval
Control S..epidermidis E..coli
Control NA 5.407745e-01 1.155851e-05
S..epidermidis 5.407745e-01 NA 1.743295e-06
E..coli 1.155851e-05 1.743295e-06 NA
> contrastEstimationMatrix(geg.matrix)
Control S..epidermidis E..coli
Control 0.000000000 0.006666667 -0.2866667
S..epidermidis -0.006666667 0.000000000 -0.2933333
E..coli 0.286666667 0.293333333 0.0000000
> friedmanTest(geg.matrix)
Friedman's rank sum test
data: geg.matrix
Friedman's chi-squared = 23.333, df = 2, p-value = 8.575e-06
> pvalues <- friedmanPost(geg.matrix)
> pvalues
Control S..epidermidis E..coli
Control NA 3.613104e-01 2.607296e-04
S..epidermidis 0.3613104285 NA 5.010332e-06
E..coli 0.0002607296 5.010332e-06 NA
> imanDavenportTest(geg.matrix)
Iman Davenport's correction of Friedman's rank sum test
data: geg.matrix
Corrected Friedman's chi-squared = 49, df1 = 2, df2 = 28, p-value = 7.162e-10
> anovaTest(geg.matrix) ## if assumptions are met ...
F-test for K population means (Analysis of Variance)
data: geg.matrix
F statistic = 28.724, df1 = 2, df2 = 42, p-value = 1.376e-08
> rankMatrix(geg.matrix)
Control S..epidermidis E..coli
[1,] 2.0 3.0 1
[2,] 2.0 3.0 1
[3,] 2.5 2.5 1
[4,] 2.5 2.5 1
[5,] 2.0 3.0 1
[6,] 3.0 2.0 1
[7,] 3.0 2.0 1
[8,] 2.0 3.0 1
[9,] 2.5 2.5 1
[10,] 2.0 3.0 1
[11,] 2.5 2.5 1
[12,] 2.0 3.0 1
[13,] 2.5 2.5 1
[14,] 2.0 3.0 1
[15,] 2.5 2.5 1
> quadeTest(geg.matrix)
Quade for Multiple Comparisons
data: geg.matrix
T = 20.376, df = 2, p-value = 3.453e-06
> multipleComparisonTest(data=geg.matrix, test="iman")
Iman Davenport's correction of Friedman's rank sum test
data: data.multipleComparisonTest
Corrected Friedman's chi-squared = 49, df1 = 2, df2 = 28, p-value = 7.162e-10
> test <- nemenyiTest (geg.matrix, alpha=0.05)
> test
Nemenyi test
data: geg.matrix
Critical difference = 0.88713, k = 3, df = 42
> test$diff.matrix
Control S..epidermidis E..coli
[1,] 0.0000000 -0.3333333 1.333333
[2,] -0.3333333 0.0000000 1.666667
[3,] 1.3333333 1.6666667 0.000000
> plotCD(test$diff.matrix, alpha = 0.05, cex = 0.75)
> raw.pvalues <- friedmanPost(geg.matrix)
> raw.pvalues
Control S..epidermidis E..coli
Control NA 3.613104e-01 2.607296e-04
S..epidermidis 0.3613104285 NA 5.010332e-06
E..coli 0.0002607296 5.010332e-06 NA
> abs(raw.pvalues) > test$statistic
Control S..epidermidis E..coli
Control NA FALSE FALSE
S..epidermidis FALSE NA FALSE
E..coli FALSE FALSE NA
> adjustFinner(raw.pvalues)
	Control	S..epidermidis	E..coli
Control	NA	0.416087	0.000521391
S..epidermidis	0.416087	NA	3.00616e-05
E..coli	0.000521391	3.00616e-05	NA
> post.results <- postHocTest(data=geg.matrix, test="aligned ranks", correct="bergmann",
+ use.rank=TRUE)
> post.results
$summary
Control S..epidermidis E..coli
[1,] 2.333333 2.666667 1
$raw.pval
Control S..epidermidis E..coli
Control NA 5.407745e-01 1.155851e-05
S..epidermidis 5.407745e-01 NA 5.810982e-07
E..coli 1.155851e-05 5.810982e-07 NA
$corrected.pval
Control S..epidermidis E..coli
Control NA 5.407745e-01 1.155851e-05
S..epidermidis 5.407745e-01 NA 1.743295e-06
E..coli 1.155851e-05 1.743295e-06 NA
> res <- tukeyTest(geg.matrix, alpha=0.1)
> res
Tukey test
data: geg.matrix
Critical difference = 0.021459, K = 3, df2 = 42
> res$diff.matrix
[,1] [,2] [,3]
[1,] NA 0.01866667 0.3120000
[2,] 0.01866667 NA 0.3306667
[3,] 0.31200000 0.33066667 NA

## Sheet: s. invicta 24 h
> library(scmamp)
> geg <- read.csv (file="~/R/FA.24.csv", head=T, sep=",")
> geg
	S..epidermidis	E..coli	Control		S..epidermidis	E..coli	Control
1	0.245	0.99	0.29	mean	0.144333	0.186	0.0416667
2	0.015	0.195	0.005	SD	0.192176	0.258693	0.0914695
3	0.03	0.1	0.01			cohen's d	glasses delta	hedges' g
4	0.305	0.29	0.24		E coli v control	0.742	0.556	0.742
5	0.02	0.045	0.025		s v control	0.679	0.531	0.679
6	0.025	0.07	0		s vs e	0.184	0.219	0.184
7	0.03	0.02	0.01
8	0.04	0.035	0.02
9	0.005	0.04	0
10	0.015	0.015	0.005
11	0	0.05	0
12	0.07	0.17	0.01
13	0.595	0.495	0
14	0.475	0.235	0.01
15	0.295	0.04	0
> geg.matrix <- data.matrix(geg)
> geg.matrix
S..epidermidis E..coli Control
[1,] 0.245 0.990 0.290
[2,] 0.015 0.195 0.005
[3,] 0.030 0.100 0.010
[4,] 0.305 0.290 0.240
[5,] 0.020 0.045 0.025
[6,] 0.025 0.070 0.000
[7,] 0.030 0.020 0.010
[8,] 0.040 0.035 0.020
[9,] 0.005 0.040 0.000
[10,] 0.015 0.015 0.005
[11,] 0.000 0.050 0.000
[12,] 0.070 0.170 0.010
[13,] 0.595 0.495 0.000
[14,] 0.475 0.235 0.010
[15,] 0.295 0.040 0.000
> postHocTest (data=geg.matrix, test="aligned ranks", correct="bergmann")
$summary
S..epidermidis E..coli Control
[1,] 0.1443333 0.186 0.04166667
$raw.pval
S..epidermidis E..coli Control
S..epidermidis NA 1.053479e-01 6.438170e-03
E..coli 0.10534791 NA 1.398795e-05
Control 0.00643817 1.398795e-05 NA
$corrected.pval
S..epidermidis E..coli Control
S..epidermidis NA 1.053479e-01 6.438170e-03
E..coli 0.10534791 NA 4.196384e-05
Control 0.00643817 4.196384e-05 NA
> contrastEstimationMatrix(geg.matrix)
S..epidermidis E..coli Control
S..epidermidis 0.00000000 -0.02666667 0.02166667
E..coli 0.02666667 0.00000000 0.04833333
Control -0.02166667 -0.04833333 0.00000000
> friedmanTest(geg.matrix)
Friedman's rank sum test
data: geg.matrix
Friedman's chi-squared = 16.3, df = 2, p-value = 0.0002887
> pvalues <- friedmanPost(geg.matrix)
> pvalues
S..epidermidis E..coli Control
S..epidermidis NA 0.4113137918 0.0025912758
E..coli 0.411313792 NA 0.0001260465
Control 0.002591276 0.0001260465 NA
> imanDavenportTest(geg.matrix)
Iman Davenport's correction of Friedman's rank sum test
data: geg.matrix
Corrected Friedman's chi-squared = 16.657, df1 = 2, df2 = 28, p-value =
1.715e-05
> anovaTest(geg.matrix) ## if assumptions are met ...
F-test for K population means (Analysis of Variance)
data: geg.matrix
F statistic = 2.2127, df1 = 2, df2 = 42, p-value = 0.122
> rankMatrix(geg.matrix)
S..epidermidis E..coli Control
[1,] 3.0 1.0 2.0
[2,] 2.0 1.0 3.0
[3,] 2.0 1.0 3.0
[4,] 1.0 2.0 3.0
[5,] 3.0 1.0 2.0
[6,] 2.0 1.0 3.0
[7,] 1.0 2.0 3.0
[8,] 1.0 2.0 3.0
[9,] 2.0 1.0 3.0
[10,] 1.5 1.5 3.0
[11,] 2.5 1.0 2.5
[12,] 2.0 1.0 3.0
[13,] 1.0 2.0 3.0
[14,] 1.0 2.0 3.0
[15,] 1.0 2.0 3.0
> quadeTest(geg.matrix)
Quade for Multiple Comparisons
data: geg.matrix
T = 9.6367, df = 2, p-value = 0.000654
> multipleComparisonTest(data=geg.matrix, test="iman")
Iman Davenport's correction of Friedman's rank sum test
data: data.multipleComparisonTest
Corrected Friedman's chi-squared = 16.657, df1 = 2, df2 = 28, p-value =
1.715e-05
> test <- nemenyiTest (geg.matrix, alpha=0.05)
> test
Nemenyi test
data: geg.matrix
Critical difference = 0.88713, k = 3, df = 42
> test$diff.matrix
S..epidermidis E..coli Control
[1,] 0.0 0.3 -1.1
[2,] 0.3 0.0 -1.4
[3,] -1.1 -1.4 0.0
> raw.pvalues <- friedmanPost(geg.matrix)
> raw.pvalues
	S..epidermidis	E..coli	Control
S..epidermidis	NA	0.411314	0.00259128
E..coli	0.411314	NA	0.000126047
Control	0.00259128	0.000126047	NA
> adjustFinner(raw.pvalues)
S..epidermidis	E..coli	Control
S..epidermidis NA	0.470506	0.00517584
E..coli 0.470506500	NA	0.00075604
Control 0.005175837	0.00075604	NA
> post.results <- postHocTest(data=geg.matrix, test="aligned ranks", correct="bergmann",
+ use.rank = T)
> post.results
$summary
S..epidermidis E..coli Control
[1,] 1.733333 1.433333 2.833333
$raw.pval
	S..epidermidis	E..coli	Control
S..epidermidis	NA	0.105348	0.00643817
E..coli	0.105348	NA	1.3988e-05
Control	0.00643817	1.3988e-05	NA
$corrected.pval
S..epidermidis	E..coli	Control
S..epidermidis NA	0.105348	0.00643817
E..coli 0.10534791	NA	4.19638e-05
Control 0.00643817	4.19638e-05	NA
> res <- tukeyTest(geg.matrix, alpha=0.1)
> res
Tukey test
data: geg.matrix
Critical difference = 0.030918, K = 3, df2 = 42
> res$diff.matrix
[,1] [,2] [,3]
[1,] NA 0.04166667 0.1026667
[2,] 0.04166667 NA 0.1443333
[3,] 0.10266667 0.14433333 NA
>
>

## Sheet: s. invicta 48 h
library("scmamp")
> #### be sure to plave the csv file in the correct directory #############
> geg <- read.csv (file="~/R/FA.csv", head=T, sep=",")
> geg					S..epidermidis	E..coli	Control
	S..epidermidis	E..coli	Control	mean	0.277333	0.288	0.092
1	0.825	1	0.675	SD	0.333069	0.292702	0.181903
2	0.025	0.375	0.04			cohen's d	glasses delta	hedges' g
3	0.09	0.125	0.04		E coli v control	0.803	0.669	0.803
4	0.78	0.76	0.345		s v control	0.689	0.556	0.689
5	0.05	0.07	0.085		s vs e	0.035	0.033	0.035
6	0.03	0.225	0.005
7	0.13	0.075	0.04
8	0.135	0.075	0.025
9	0.01	0.06	0.005
10	0.02	0.025	0.035
11	0	0.145	0.005
12	0.1	0.275	0.02
13	0.87	0.61	0.02
14	0.59	0.4	0.02
15	0.505	0.1	0.02
> ## convert to matrix
> geg.matrix <- data.matrix(geg)
> geg.matrix
S..epidermidis E..coli Control
[1,] 0.825 1.000 0.675
[2,] 0.025 0.375 0.040
[3,] 0.090 0.125 0.040
[4,] 0.780 0.760 0.345
[5,] 0.050 0.070 0.085
[6,] 0.030 0.225 0.005
[7,] 0.130 0.075 0.040
[8,] 0.135 0.075 0.025
[9,] 0.010 0.060 0.005
[10,] 0.020 0.025 0.035
[11,] 0.000 0.145 0.005
[12,] 0.100 0.275 0.020
[13,] 0.870 0.610 0.020
[14,] 0.590 0.400 0.020
[15,] 0.505 0.100 0.020
> postHocTest (data=geg.matrix, test="aligned ranks", correct="bergmann")
$summary
S..epidermidis E..coli Control
[1,] 0.2773333 0.288 0.092
$raw.pval
S..epidermidis E..coli Control
S..epidermidis NA 0.297146530 0.002175522
E..coli 0.297146530 NA 0.000039956
Control 0.002175522 0.000039956 NA
$corrected.pval
S..epidermidis E..coli Control
S..epidermidis NA 0.297146530 0.002175522
E..coli 0.297146530 NA 0.000119868
Control 0.002175522 0.000119868 NA
> contrastEstimationMatrix(geg.matrix)
S..epidermidis E..coli Control
S..epidermidis 0.00000000 -0.03333333 0.09333333
E..coli 0.03333333 0.00000000 0.12666667
Control -0.09333333 -0.12666667 0.00000000
> friedmanTest(geg.matrix)
Friedman's rank sum test
data: geg.matrix
Friedman's chi-squared = 8.9333, df = 2, p-value = 0.01149
> pvalues <- friedmanPost(geg.matrix)
> pvalues
S..epidermidis E..coli Control
S..epidermidis NA 0.361310429 0.044609718
E..coli 0.36131043 NA 0.003487005
Control 0.04460972 0.003487005 NA
> imanDavenportTest(geg.matrix)
Iman Davenport's correction of Friedman's rank sum test
data: geg.matrix
Corrected Friedman's chi-squared = 5.9367, df1 = 2, df2 = 28, p-value = 0.00709
> anovaTest(geg.matrix) ## if assumptions are met ...
F-test for K population means (Analysis of Variance)
data: geg.matrix
F statistic = 2.3796, df1 = 2, df2 = 42, p-value = 0.105
> rankMatrix(geg.matrix)
S..epidermidis E..coli Control
[1,] 2 1 3
[2,] 3 1 2
[3,] 2 1 3
[4,] 1 2 3
[5,] 3 2 1
[6,] 2 1 3
[7,] 1 2 3
[8,] 1 2 3
[9,] 2 1 3
[10,] 3 2 1
[11,] 3 1 2
[12,] 2 1 3
[13,] 1 2 3
[14,] 1 2 3
[15,] 1 2 3
> quadeTest(geg.matrix)
Quade for Multiple Comparisons
data: geg.matrix
T = 8.3098, df = 2, p-value = 0.001468
> multipleComparisonTest(data=geg.matrix, test="iman")
Iman Davenport's correction of Friedman's rank sum test
data: data.multipleComparisonTest
Corrected Friedman's chi-squared = 5.9367, df1 = 2, df2 = 28, p-value = 0.00709
> test <- nemenyiTest (geg.matrix, alpha=0.05)
> test
Nemenyi test
data: geg.matrix
Critical difference = 0.88713, k = 3, df = 42
> test$diff.matrix
S..epidermidis E..coli Control
[1,] 0.0000000 0.3333333 -0.7333333
[2,] 0.3333333 0.0000000 -1.0666667
[3,] -0.7333333 -1.0666667 0.0000000
> plotCD(test$diff.matrix, alpha = 0.05, cex = 0.75)
> raw.pvalues <- friedmanPost(geg.matrix)
> raw.pvalues
S..epidermidis E..coli Control
S..epidermidis	NA	0.36131	0.0446097
E..coli	0.36131	NA	0.00348701
Control	0.0446097	0.00348701	NA
> abs(raw.pvalues) > test$statistic
S..epidermidis E..coli Control
S..epidermidis NA FALSE FALSE
E..coli FALSE NA FALSE
Control FALSE FALSE NA
> adjustFinner(raw.pvalues)
	S..epidermidis	E..coli	Control
S..epidermidis	NA	0.416087	0.0872294
E..coli	0.416087	NA	0.0207405
Control	0.0872294	0.0207405	NA
> post.results <- postHocTest(data=geg.matrix, test="aligned ranks", correct="bergmann",
+ use.rank=TRUE)
> post.results
$summary
S..epidermidis E..coli Control
[1,] 1.866667 1.533333 2.6
$raw.pval
S..epidermidis E..coli Control
S..epidermidis NA 0.297146530 0.002175522
E..coli 0.297146530 NA 0.000039956
Control 0.002175522 0.000039956 NA
$corrected.pval
S..epidermidis E..coli Control
S..epidermidis NA 0.297146530 0.002175522
E..coli 0.297146530 NA 0.000119868
Control 0.002175522 0.000119868 NA
> res <- tukeyTest(geg.matrix, alpha=0.1)
> res
res <- tukeyTest(geg.matrix, alpha=0.05)
> res
Tukey test
data: geg.matrix
Critical difference = 0.030841, K = 3, df2 = 42
> res$diff.matrix
[,1] [,2] [,3]
[1,] NA 0.01066667 0.1853333
[2,] 0.01066667 NA 0.1960000
[3,] 0.18533333 0.19600000 NA
>

## Sheet: wts
Ant Species	Colony	Exposure Treatment and in vitro challenge	Inhibition (% computed using plated max and min growth curves)
B. chinensis	4	Control vs E. coli	73.9511
B. chinensis	5	Control vs E. coli	159.241
B. chinensis	6	Control vs E. coli	223.645
B. chinensis	7	Control vs E. coli	194.244
B. chinensis	8	Control vs E. coli	215.906
B. chinensis	9	Control vs E. coli	113.216
B. chinensis	10	Control vs E. coli	110.202
B. chinensis	11	Control vs E. coli	196.348
B. chinensis	12	Control vs E. coli	275.214
B. chinensis	13	Control vs E. coli	265.325
B. chinensis	14	Control vs E. coli	202.839
B. chinensis	15	Control vs E. coli	262.351
B. chinensis	16	Control vs E. coli	210.785
B. chinensis	17	Control vs E. coli	266.985
B. chinensis	18	Control vs E. coli	295.853
B. chinensis	4	E. coli vs. E. coli	188.592
B. chinensis	5	E. coli vs. E. coli	68.8611
B. chinensis	6	E. coli vs. E. coli	110.416
B. chinensis	7	E. coli vs. E. coli	139.564
B. chinensis	8	E. coli vs. E. coli	168.994
B. chinensis	9	E. coli vs. E. coli	119.18
B. chinensis	10	E. coli vs. E. coli	107.686
B. chinensis	11	E. coli vs. E. coli	207.767
B. chinensis	12	E. coli vs. E. coli	233.821
B. chinensis	13	E. coli vs. E. coli	222.049
B. chinensis	14	E. coli vs. E. coli	294.384
B. chinensis	15	E. coli vs. E. coli	215.658
B. chinensis	16	E. coli vs. E. coli	189.014
B. chinensis	17	E. coli vs. E. coli	208.346
B. chinensis	18	E. coli vs. E. coli	203.665
B. chinensis	1	Control vs S. epidermidis	405.241
B. chinensis	2	Control vs S. epidermidis	669.956
B. chinensis	3	Control vs S. epidermidis	544.771
B. chinensis	4	Control vs S. epidermidis	922.781
B. chinensis	5	Control vs S. epidermidis	894.459
B. chinensis	6	Control vs S. epidermidis	524.458
B. chinensis	7	Control vs S. epidermidis	449.612
B. chinensis	8	Control vs S. epidermidis	498.024
B. chinensis	9	Control vs S. epidermidis	725.161
B. chinensis	10	Control vs S. epidermidis	605.033
B. chinensis	11	Control vs S. epidermidis	620.88
B. chinensis	12	Control vs S. epidermidis	701.399
B. chinensis	13	Control vs S. epidermidis	569.446
B. chinensis	14	Control vs S. epidermidis	715.578
B. chinensis	15	Control vs S. epidermidis	696.925
B. chinensis	1	S. epidermidis vs S. epidermidis	479.871
B. chinensis	2	S. epidermidis vs S. epidermidis	739.43
B. chinensis	3	S. epidermidis vs S. epidermidis	338.569
B. chinensis	4	S. epidermidis vs S. epidermidis	794.443
B. chinensis	5	S. epidermidis vs S. epidermidis	705.416
B. chinensis	6	S. epidermidis vs S. epidermidis	643.615
B. chinensis	7	S. epidermidis vs S. epidermidis	484.132
B. chinensis	8	S. epidermidis vs S. epidermidis	601.741
B. chinensis	9	S. epidermidis vs S. epidermidis	708.813
B. chinensis	10	S. epidermidis vs S. epidermidis	915.068
B. chinensis	11	S. epidermidis vs S. epidermidis	758.169
B. chinensis	12	S. epidermidis vs S. epidermidis	685.989
B. chinensis	13	S. epidermidis vs S. epidermidis	668.541
B. chinensis	14	S. epidermidis vs S. epidermidis	505.832
B. chinensis	15	S. epidermidis vs S. epidermidis	673.343
S. invicta	1	Control vs E. coli	221.487
S. invicta	2	Control vs E. coli	-39.0101
S. invicta	3	Control vs E. coli	78.6172
S. invicta	4	Control vs E. coli	98.1673
S. invicta	5	Control vs E. coli	93.6013
S. invicta	6	Control vs E. coli	107.362
S. invicta	7	Control vs E. coli	103.224
S. invicta	8	Control vs E. coli	98.9212
S. invicta	9	Control vs E. coli	106.57
S. invicta	10	Control vs E. coli	100.665
S. invicta	11	Control vs E. coli	100.49
S. invicta	12	Control vs E. coli	118.352
S. invicta	13	Control vs E. coli	110.139
S. invicta	14	Control vs E. coli	81.4028
S. invicta	15	Control vs E. coli	99.0126
S. invicta	1	E. coli vs. E. coli	38.8712
S. invicta	2	E. coli vs. E. coli	604
S. invicta	3	E. coli vs. E. coli	-216.865
S. invicta	4	E. coli vs. E. coli	91.1031
S. invicta	5	E. coli vs. E. coli	89.1246
S. invicta	6	E. coli vs. E. coli	103.225
S. invicta	7	E. coli vs. E. coli	98.8673
S. invicta	8	E. coli vs. E. coli	95.215
S. invicta	9	E. coli vs. E. coli	118.866
S. invicta	10	E. coli vs. E. coli	100.938
S. invicta	11	E. coli vs. E. coli	99.5017
S. invicta	12	E. coli vs. E. coli	128.749
S. invicta	13	E. coli vs. E. coli	83.9155
S. invicta	14	E. coli vs. E. coli	70.0107
S. invicta	15	E. coli vs. E. coli	102.183
S. invicta	1	Control vs S. epidermidis	85.0668
S. invicta	2	Control vs S. epidermidis	-44.8093
S. invicta	3	Control vs S. epidermidis	20.5121
S. invicta	4	Control vs S. epidermidis	105.297
S. invicta	5	Control vs S. epidermidis	20.3505
S. invicta	6	Control vs S. epidermidis	91.814
S. invicta	7	Control vs S. epidermidis	65.4148
S. invicta	8	Control vs S. epidermidis	88.0142
S. invicta	9	Control vs S. epidermidis	111.959
S. invicta	10	Control vs S. epidermidis	92.6706
S. invicta	11	Control vs S. epidermidis	94.5933
S. invicta	12	Control vs S. epidermidis	78.1178
S. invicta	13	Control vs S. epidermidis	72.4026
S. invicta	14	Control vs S. epidermidis	-106.128
S. invicta	15	Control vs S. epidermidis	99.803
S. invicta	1	S. epidermidis vs S. epidermidis	17.6021
S. invicta	2	S. epidermidis vs S. epidermidis	8.32728
S. invicta	3	S. epidermidis vs S. epidermidis	266.575
S. invicta	4	S. epidermidis vs S. epidermidis	101.348
S. invicta	5	S. epidermidis vs S. epidermidis	94.1662
S. invicta	6	S. epidermidis vs S. epidermidis	97.2328
S. invicta	7	S. epidermidis vs S. epidermidis	110.005
S. invicta	8	S. epidermidis vs S. epidermidis	79.521
S. invicta	9	S. epidermidis vs S. epidermidis	70.974
S. invicta	10	S. epidermidis vs S. epidermidis	104.038
S. invicta	11	S. epidermidis vs S. epidermidis	97.1223
S. invicta	12	S. epidermidis vs S. epidermidis	78.1423
S. invicta	13	S. epidermidis vs S. epidermidis	72.6833
S. invicta	14	S. epidermidis vs S. epidermidis	85.5684
S. invicta	15	S. epidermidis vs S. epidermidis	104.463

[truncated: 2 more sheets: b. chinensis , s. invicta ]
